# Supplementary material
Source: publisher figshare collection journal article supplement (https://tandf.figshare.com/ndownloader/files/16261643)

**Figure S1**

**Figure S2**


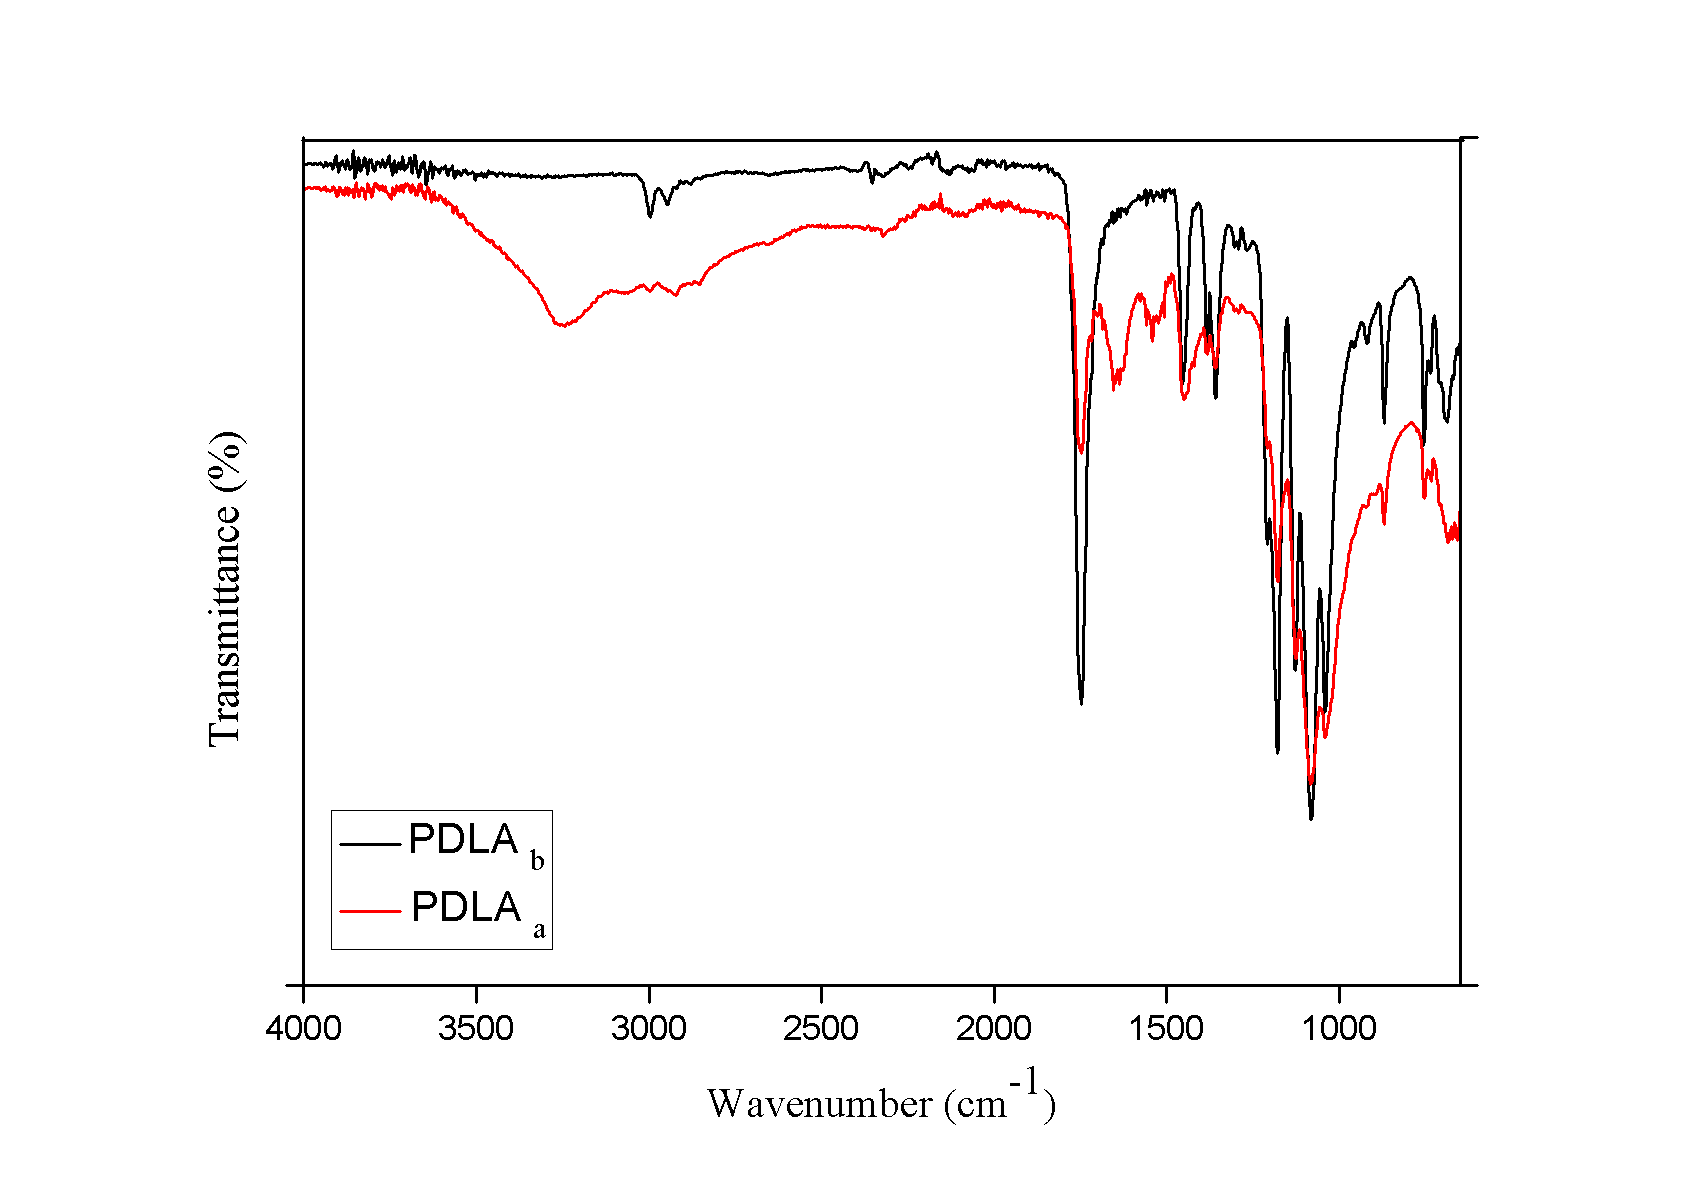

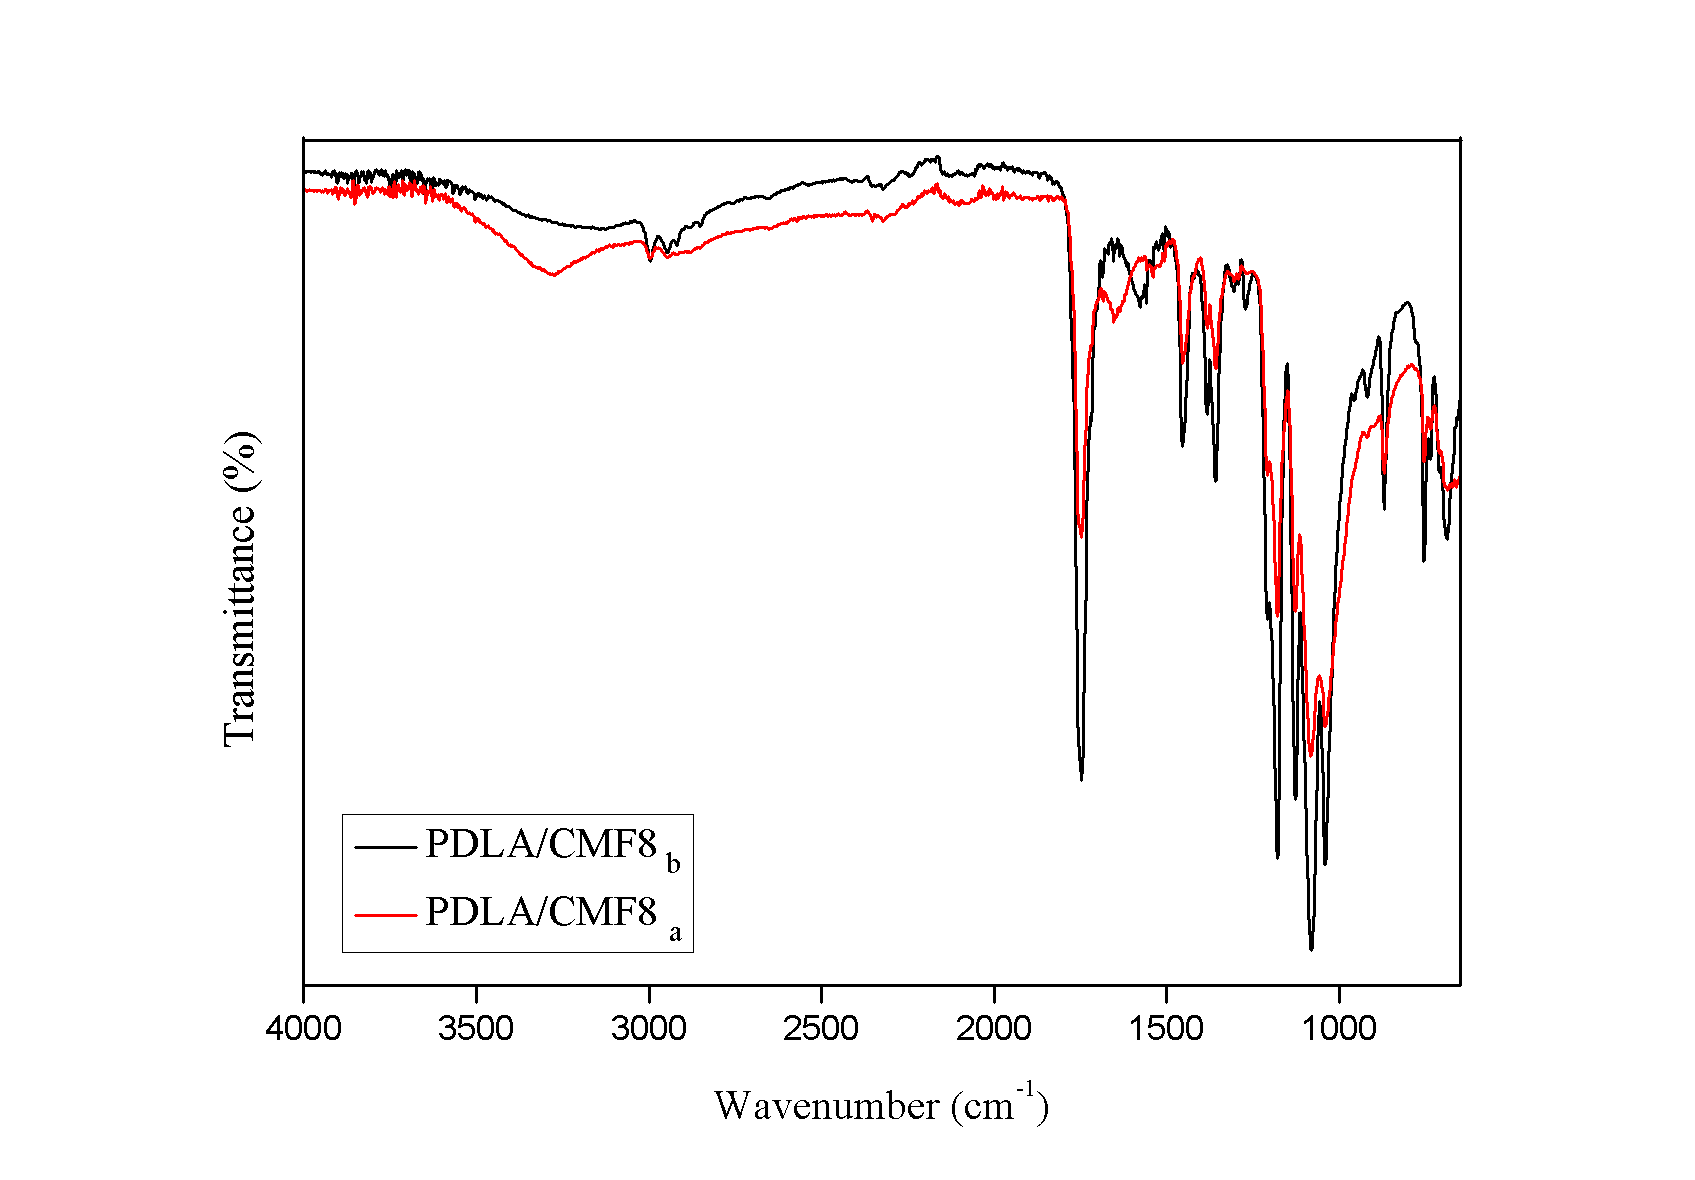


**Figure S3**


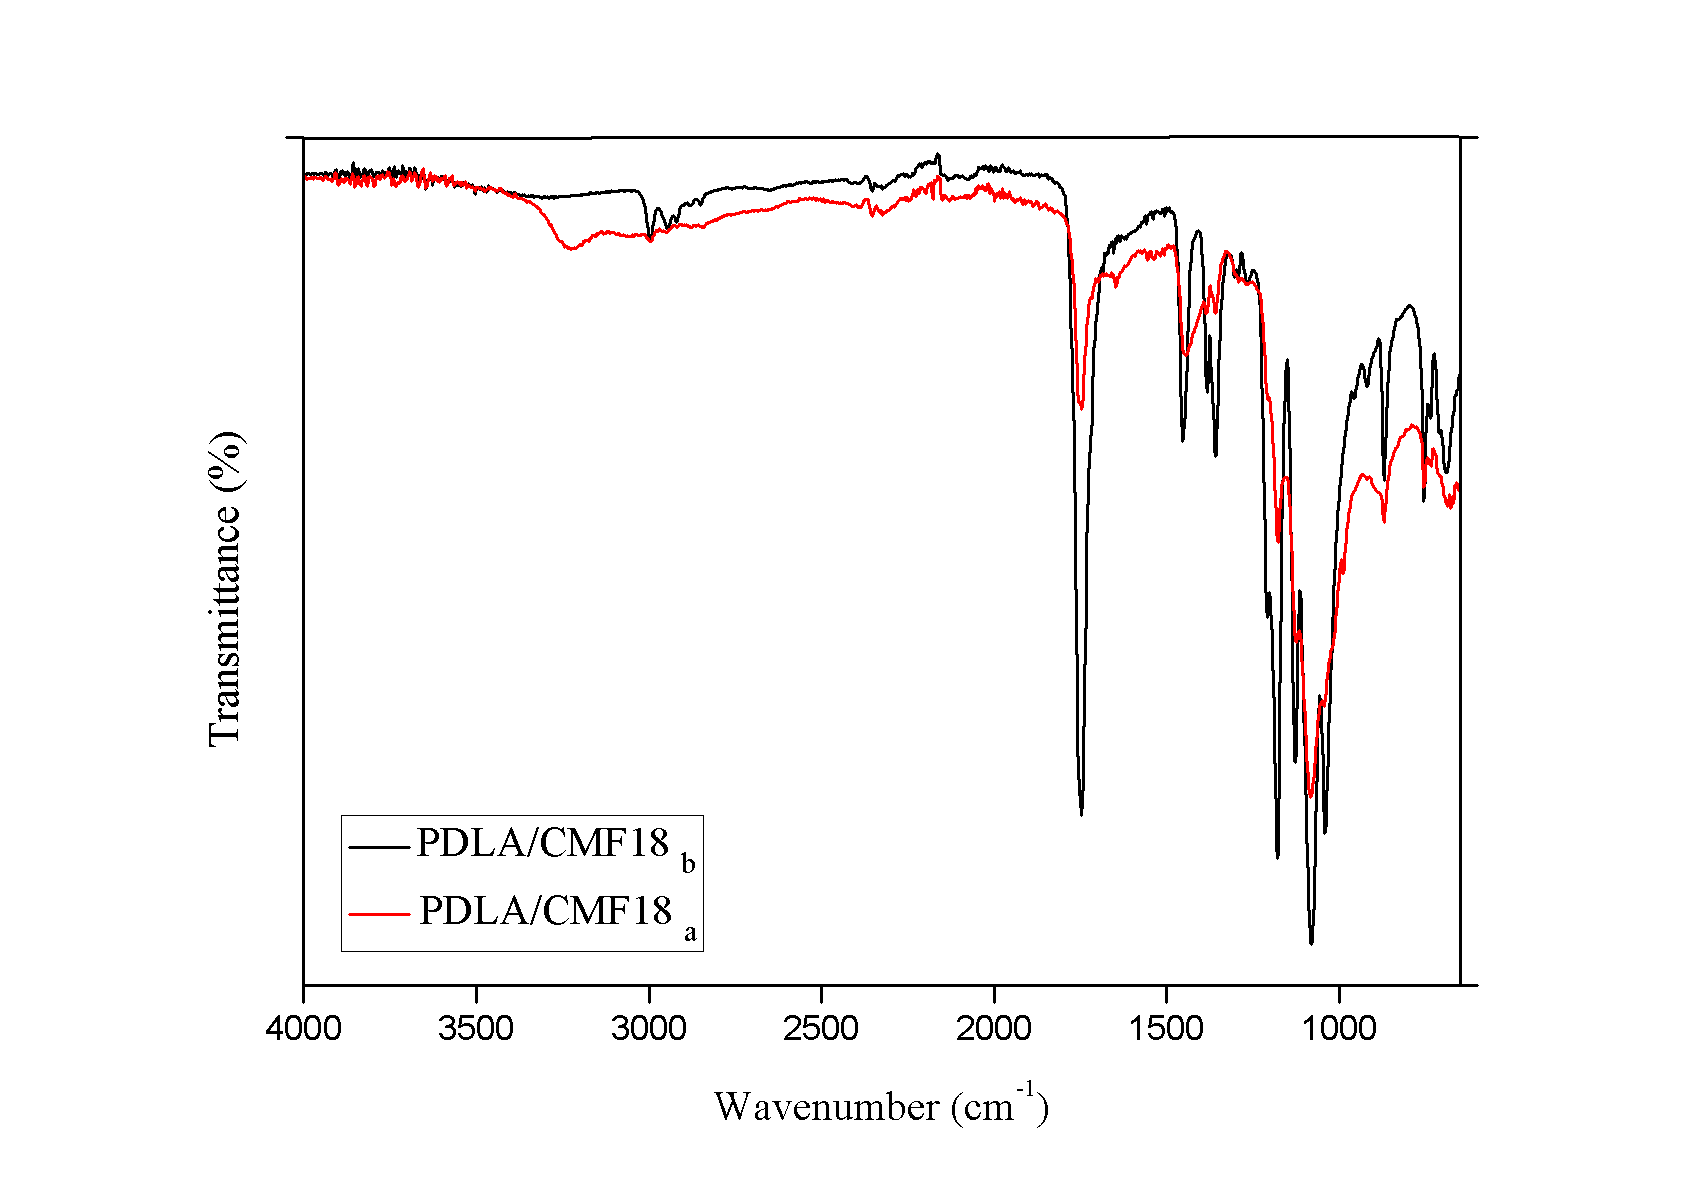

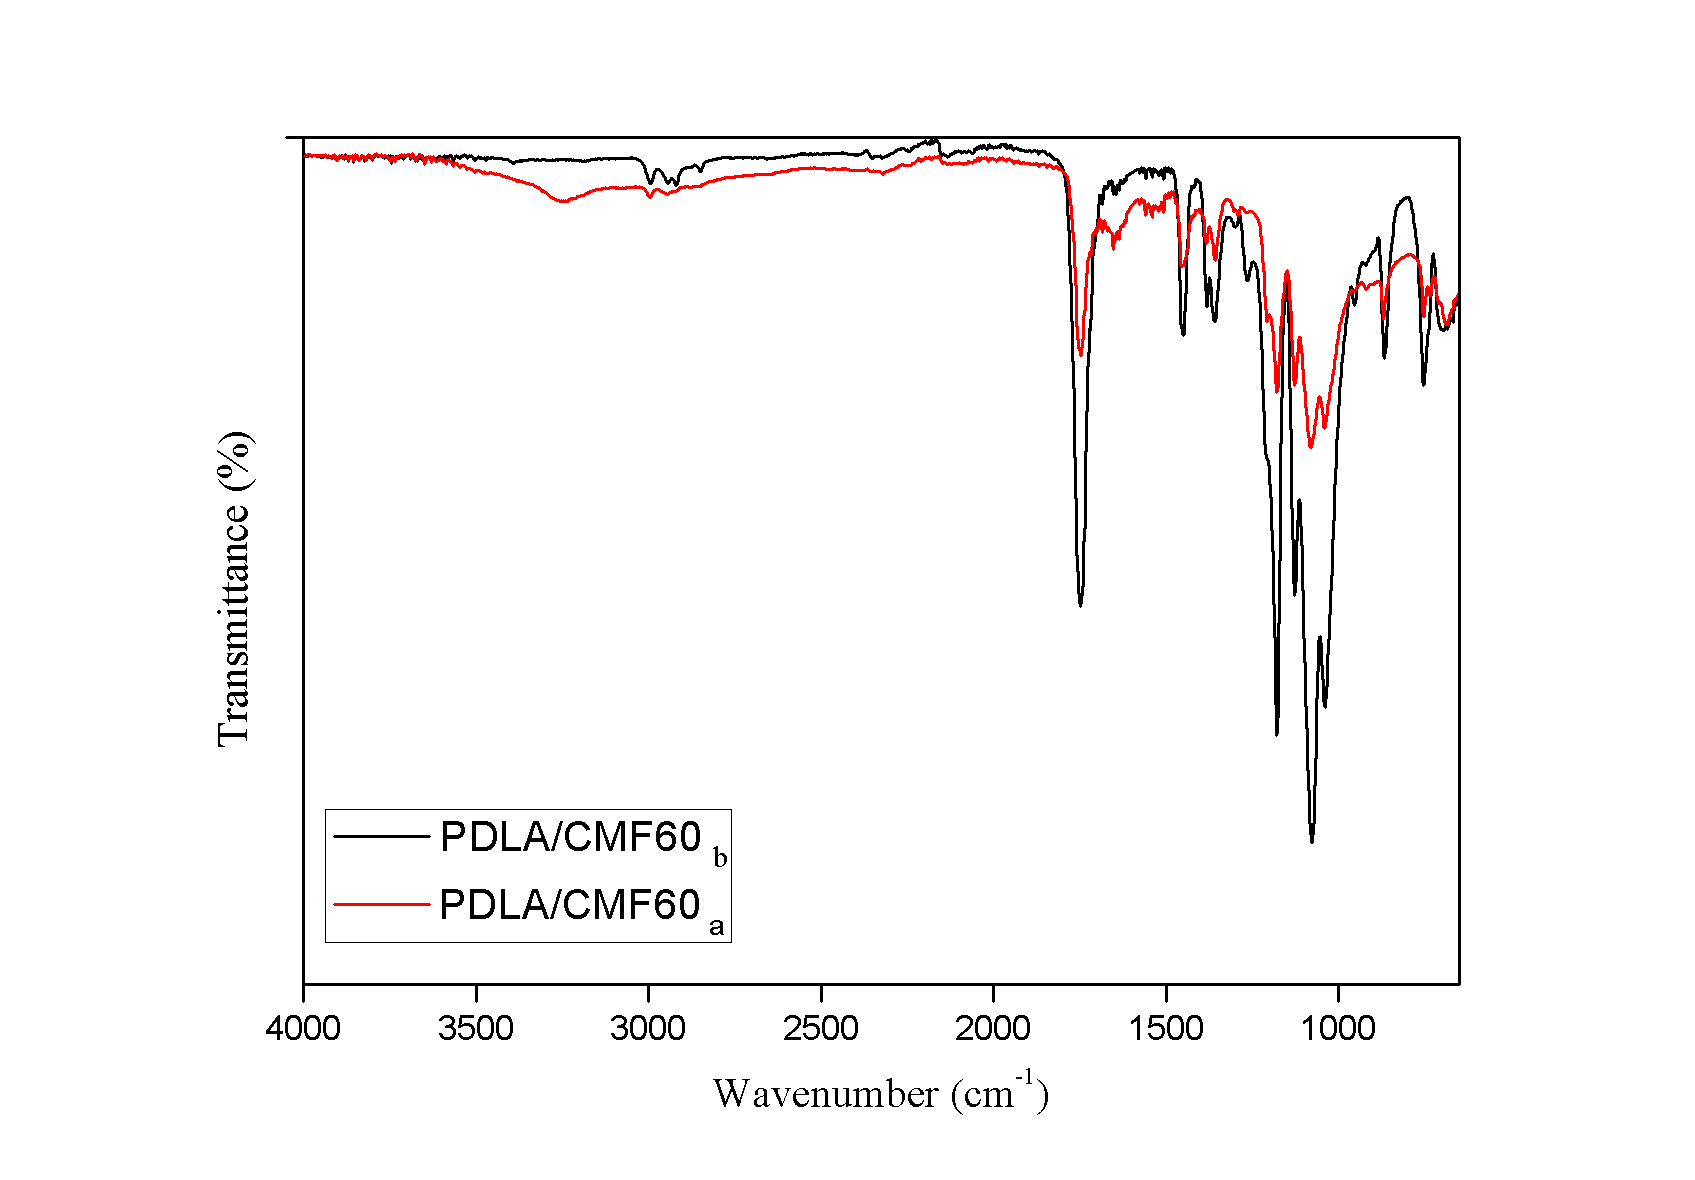

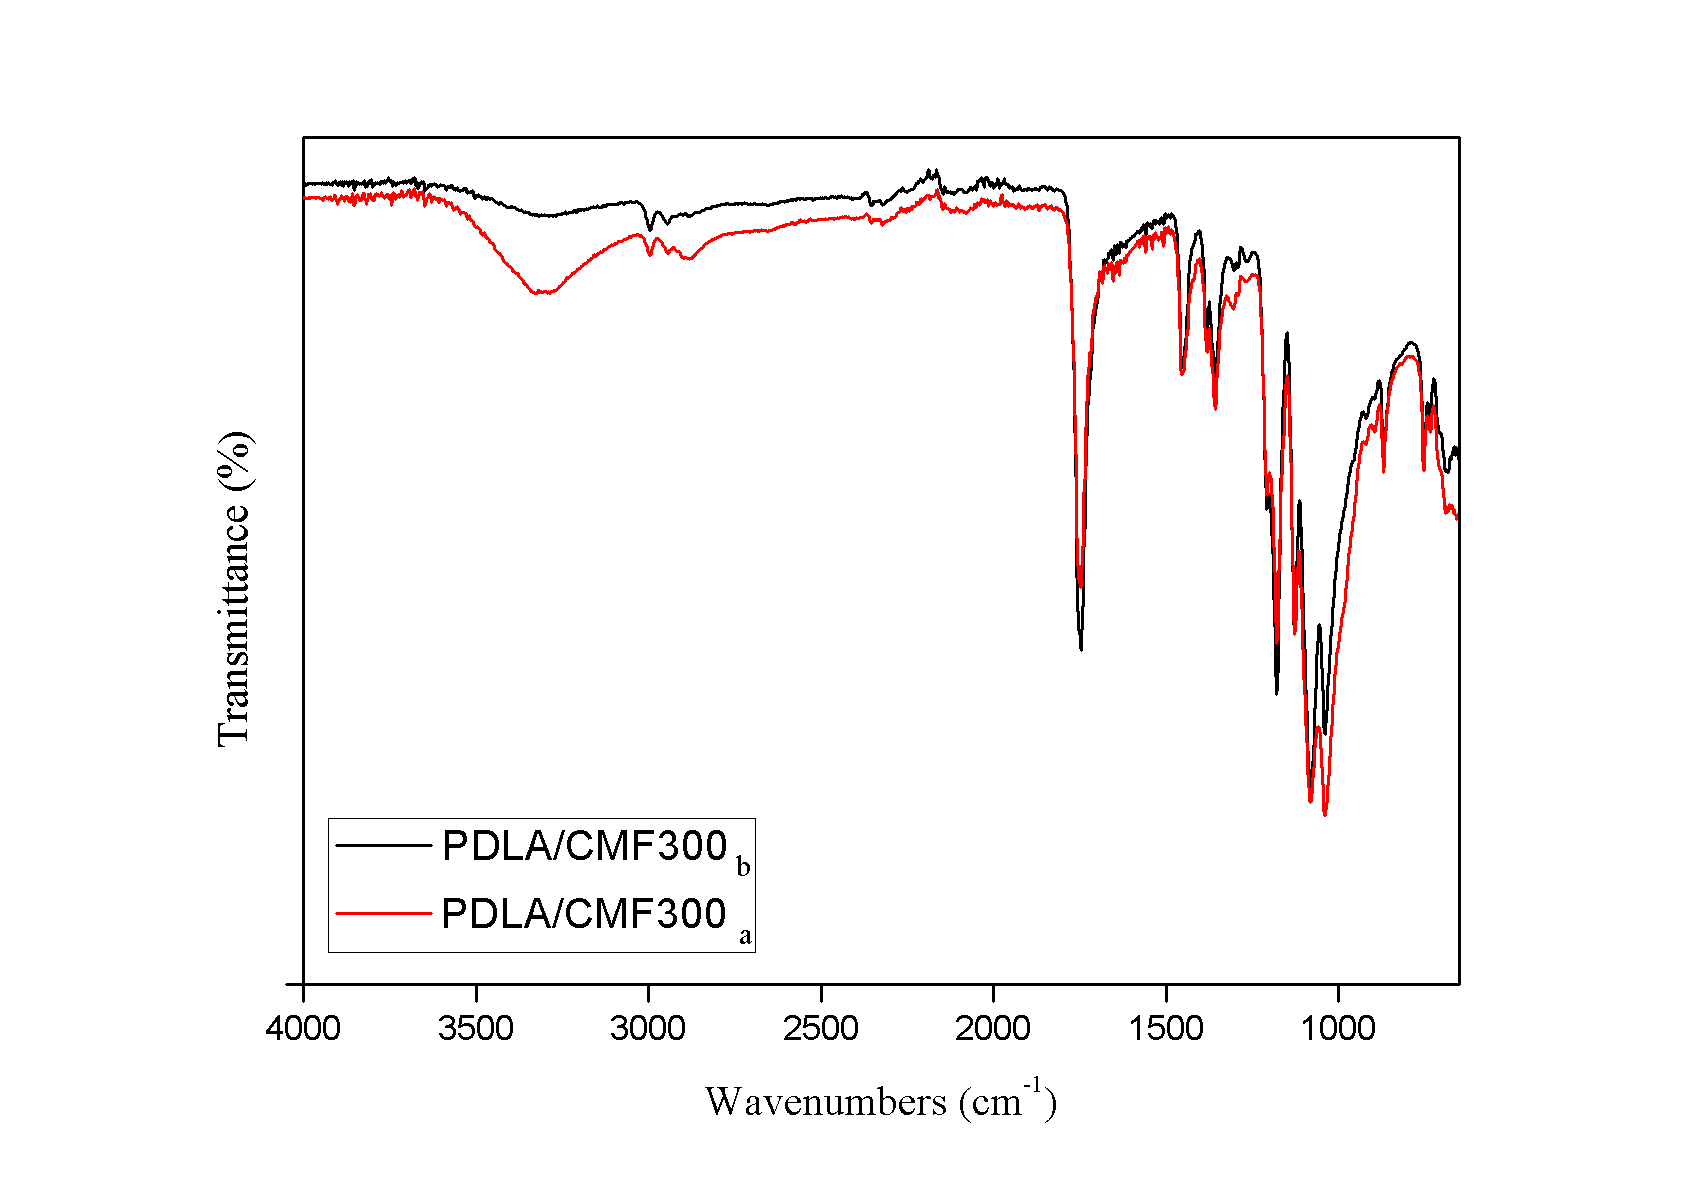

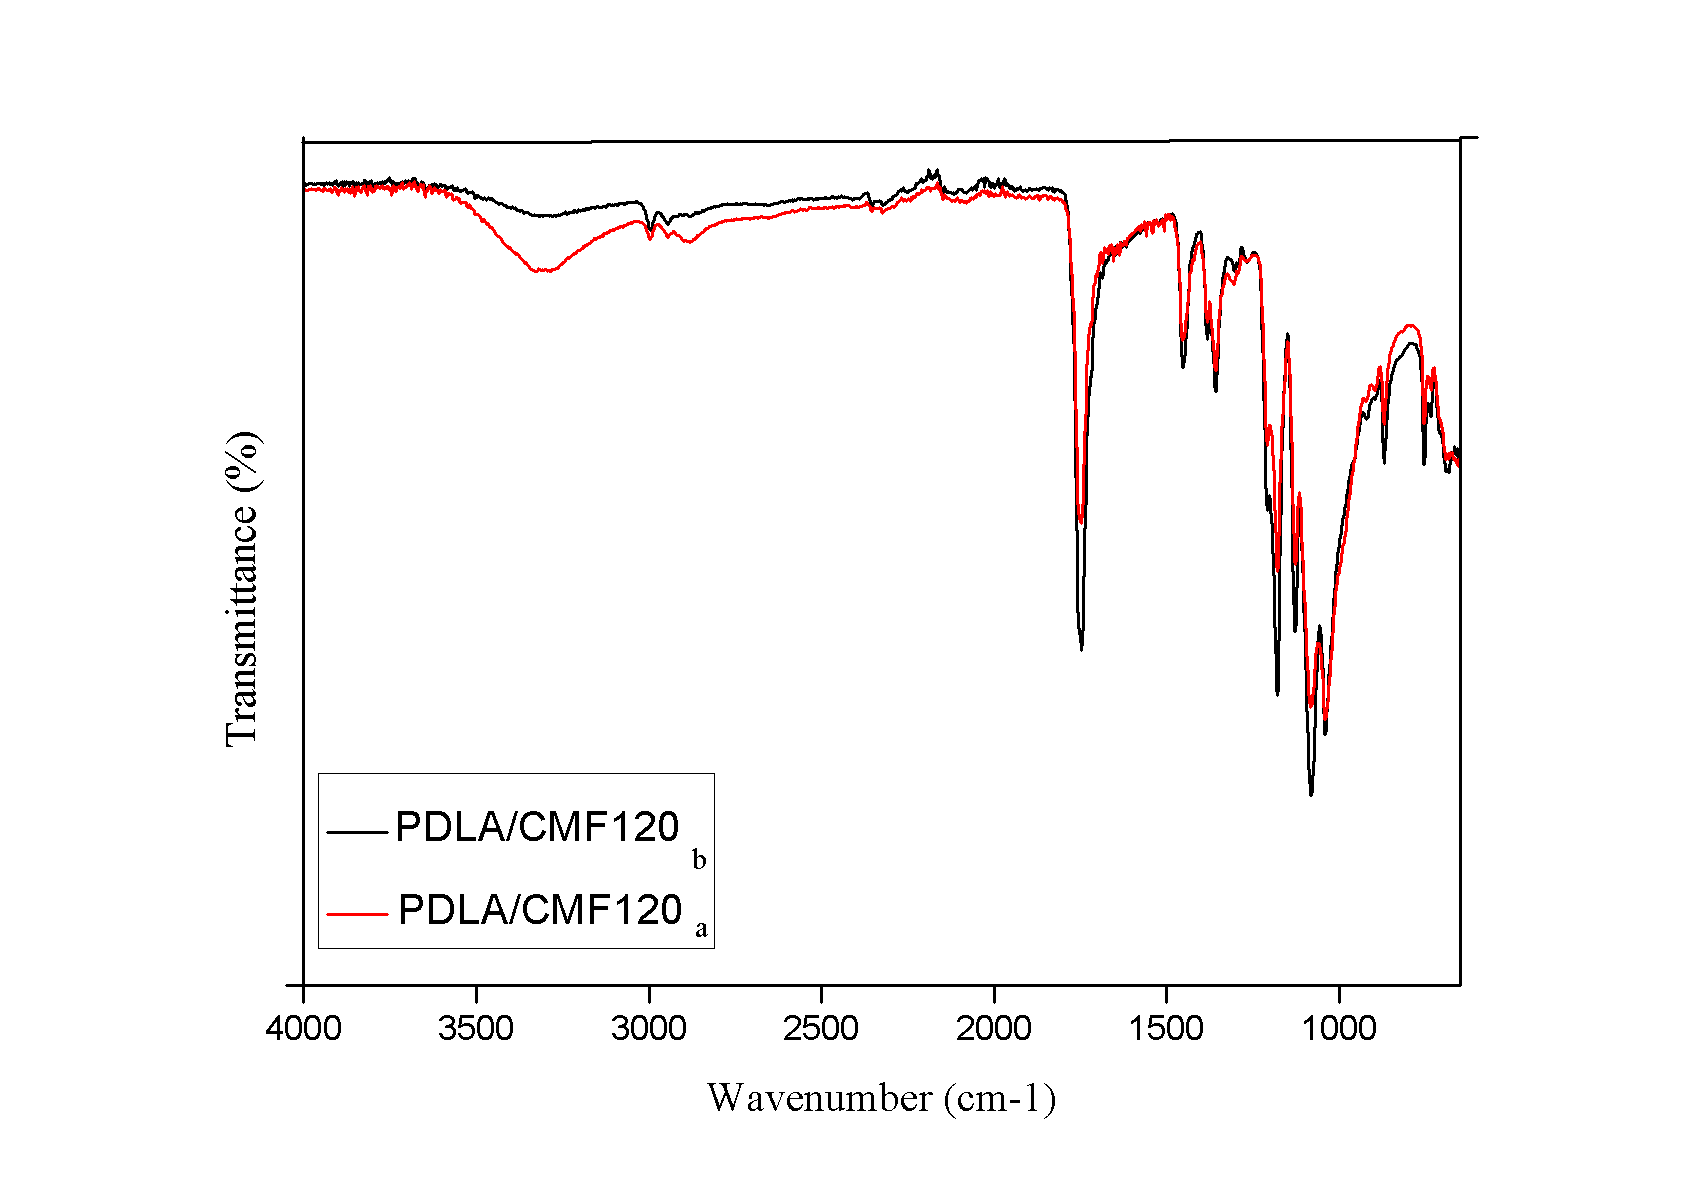

Supplement: Supplementary file 1 [file 16261643]
